# Supplementary material for: A Simple Physical Model Predicts Small Exon Length Variations
Source: PLoS Genet. 2006 Apr 28;2(4):e45. doi: 10.1371/journal.pgen.0020045 (PMC1449888; doi:10.1371/journal.pgen.0020045)
Supplement: Table S1 — Note that, in order to correct for NMD, the number of variations of length three has been multiplied by 0.53 and rounded to the nearest integer. (11 KB PDF) [file pgen.0020045.st001.pdf]

# Supporting Table S1: Frequences of small exon-length variations

Tzu-Ming Chern      Erik van Nimwegen      Chikatoshi Kai      Jun Kawai  
Piero Carninci      Yoshihide Hayashizaki      Mihaela Zavolan

December 10, 2005

| splice site  | perc. 1 (num.)   | perc. 2 (num.)   | perc. 3 (num.)   | perc. 4 (num.)    |
|--------------|------------------|------------------|------------------|-------------------|
| CDS acceptor | $0.19 \pm 0.032$ | $0.08 \pm 0.022$ | $0.6 \pm 0.04$   | $0.13 \pm 0.027$  |
| UTR acceptor | $0.13 \pm 0.063$ | $0.09 \pm 0.053$ | $0.5 \pm 0.093$  | $0.29 \pm 0.085$  |
| NC acceptor  | $0.13 \pm 0.14$  | $0.07 \pm 0.11$  | $0.6 \pm 0.20$   | $0.2 \pm 0.167$   |
| CDS donor    | $0.32 \pm 0.077$ | $0.24 \pm 0.071$ | $0.12 \pm 0.071$ | $0.32 \pm 0.077$  |
| UTR donor    | $0.29 \pm 0.13$  | $0.14 \pm 0.097$ | $0.05 \pm 0.061$ | $0.51 \pm 0.14$   |
| NC donor     | $0.38 \pm 0.34$  | $0.38 \pm 0.34$  | $0 \pm 0$        | $0.25 \pm 0.31XS$ |

The relative frequencies and two standard errors of exon-length variations of length 1 through 4 at donor and acceptor sites of different exons types. Note that, in order to correct for NMD, the number of variations of lengths 3 has been multiplied by 0.53 and rounded to the nearest integer.
